# Supplementary material for: Implementation of anion-receptor macrocycles in supramolecular tandem assays for enzymes involving nucleotides as substrates, products, and cofactors
Source: Royal Society of Chemistry journal article supplement (doi:10.1039/b925192h), 2010-01-01
Supplement: b925192h.pdf [file b925192h.pdf]

*Electronic Supplementary Information for*

**Implementation of Anion-Receptor Macrocycles in  
Supramolecular Tandem Assays for Enzymes Involving  
Nucleotides as Substrates, Products, and Cofactors**

Mara Florea and Werner M. Nau\*

*School of Engineering and Science, Jacobs University Bremen, Campus Ring 1,  
D-28759 Bremen, Germany. E-mail: [w.nau@jacobs-university.de](mailto:w.nau@jacobs-university.de)*

**1. Additional Experimental Results**

Fig. S1 shows the results from the independent monitoring of the enzymatic activity by using  $^{31}\text{P}$  NMR. The enzymatic conversion, which transforms ATP into AMP and inorganic orthophosphate resulted in the disappearance of the three ATP  $^{31}\text{P}$  NMR signals and the concomitant appearance of two new signals corresponding to the two products.

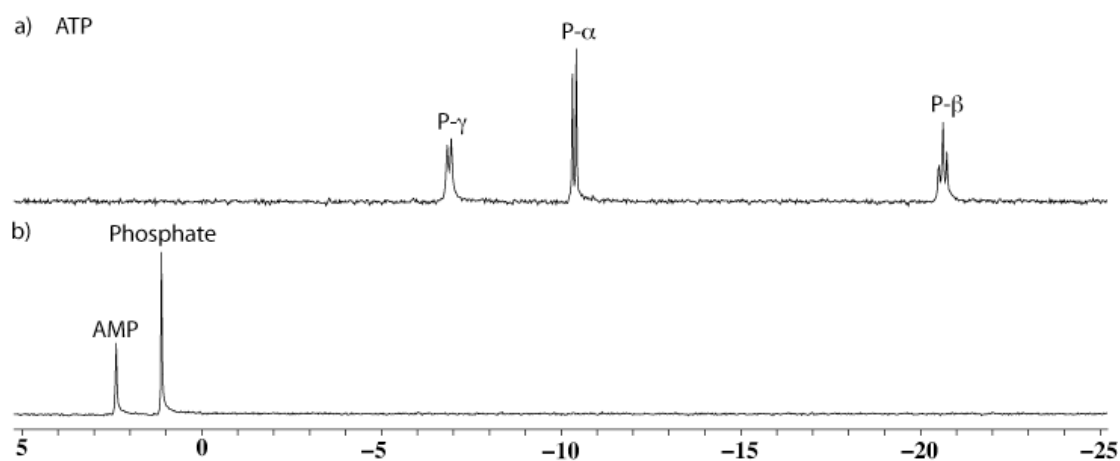

**Fig. S1**  $^{31}\text{P}$  NMR spectra of 5 mM ATP in  $\text{D}_2\text{O}$  with 1.6 mM  $\text{CaCl}_2$  a) before and b) after enzymatic conversion to AMP and orthophosphate. The reaction was effected by the addition of 25  $\mu\text{g}/\text{mL}$  apyrase and after a reaction time of 120 min.

The dephosphorylation could also be monitored with ADP as substrate, which is shown in Fig. S2.

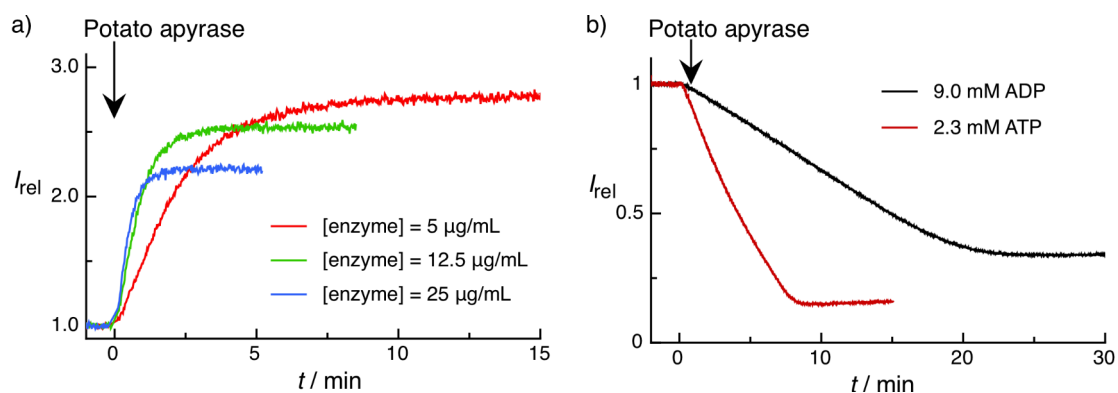

**Fig. S2** a) Changes in normalized fluorescence intensity of the **1**/ANS reporter pair (both 25  $\mu\text{M}$ , in NaOAc buffer, pH 5.5, with 1.8 mM  $\text{Mn}^{2+}$ ,  $\lambda_{exc} = 318$  nm,  $\lambda_{obs} = 462$  nm) monitoring potato apyrase activity with ADP as substrate; assays were initiated by addition of different concentrations of potato apyrase to 25  $\mu\text{M}$  ADP. b) Changes in normalized fluorescence intensity of the **2**/HPTS reporter pair (both 6.3  $\mu\text{M}$ , in sodium succinate buffer, pH 6.5, with 1.6 mM  $\text{Ca}^{2+}$ ,  $\lambda_{exc} = 403$  nm,  $\lambda_{em} = 512$  nm) monitoring potato apyrase activity with ADP versus ATP as substrate; assays were initiated by addition of 100  $\mu\text{g/ml}$  potato apyrase to 9.0 mM ADP (black) and 2.3 mM ATP (red).

Fig. S3 shows the evolution of steady-state fluorescence intensity with time monitoring potato apyrase activity at different enzyme concentrations. The initial rates,  $v_0$ , obtained by linear fits of the normalized intensities (assuming a conversion linear with the fluorescence intensity and full conversion at the plateau region) increased approximately linearly with the enzyme concentration. The  $v_0$  values were as follows:  $v_{0, 50 \mu\text{g/ml}} = 0.23 \text{ a.u./min}$ ,  $v_{0, 25 \mu\text{g/ml}} = 0.15 \text{ a.u./min}$ ,  $v_{0, 12.5 \mu\text{g/ml}} = 0.07 \text{ a.u./min}$ , and  $v_{0, 5 \mu\text{g/ml}} = 0.02 \text{ a.u./min}$  for the **1**/ANS reporter pair (Fig. S3a), and  $v_{0, 100 \mu\text{g/ml}} = 0.17 \text{ a.u./min}$ ,  $v_{0, 50 \mu\text{g/ml}} = 0.09 \text{ a.u./min}$ , and  $v_{0, 25 \mu\text{g/ml}} = 0.04 \text{ a.u./min}$  with the **2**/HPTS reporter pair (Fig. S3b). Note that the absolute rates are not directly comparable between the two reporter pairs due to the use of arbitrary units.

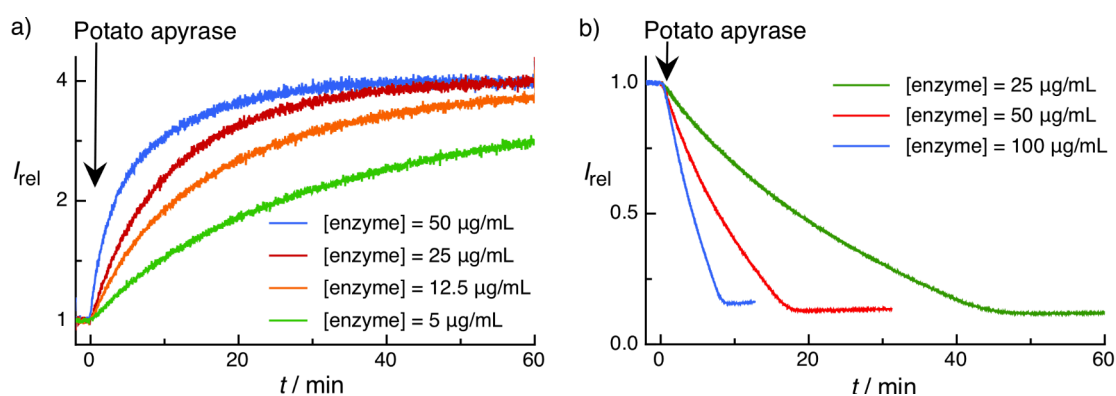

**Fig. S3** Evolution of normalized fluorescence intensity monitoring potato apyrase activity at different enzyme concentrations a) with the **1**/ANS reporter pair (both 25  $\mu\text{M}$ , in NaOAc buffer, pH 5.5, with 1.8 mM  $\text{Ca}^{2+}$ ,  $\lambda_{exc} = 318 \text{ nm}$ ,  $\lambda_{obs} = 462 \text{ nm}$ ) and ATP (25  $\mu\text{M}$ ) as substrate, and b) with the **2**/HPTS reporter pair (both 6.3  $\mu\text{M}$ , in sodium succinate buffer, pH 6.5, with 1.6 mM  $\text{Ca}^{2+}$ ,  $\lambda_{exc} = 403 \text{ nm}$ ,  $\lambda_{obs} = 512 \text{ nm}$ ) and ATP (2.3 mM) as substrate.
